# Supplementary material for: Sustainable Drug Delivery of Famotidine Using Chitosan‐Functionalized Graphene Oxide as Nanocarrier
Source: PubMed Central journal article supplement (PMC6777207; doi:10.1002/gch2.201900002), 2019-08-14
Supplement: GCH2-3-1900002-s001.pdf [file GCH2-3-1900002-s001.pdf]

# Global Challenges

---

Open Access

## Supporting Information

for *Global Challenges*, DOI: 10.1002/gch2.201900002

**Sustainable Drug Delivery of Famotidine Using  
Chitosan-Functionalized Graphene Oxide as Nanocarrier**

*Chetan Ramesh Mahajan, Lalit B. Joshi, Umakant Varma,  
Jitendra B. Naik, Vijay Raman Chaudhari, and Satyendra  
Mishra\**

# **Sustainable Drug Delivery of Famotidine using Chitosan- Functionalized Graphene**

## **Oxide as Nano-carrier**

Chetan R. Mahajan, Lalit B. Joshi, Umakant Varma, Jitendra B. Naik, Vijay Raman

Chaudhari, Satyendra Mishra\*

*University Institute of Chemical Technology, North Maharashtra University, Jalgaon*

*425001, Maharashtra, India.*

\* Corresponding author: [profsm@rediffmail.com](mailto:profsm@rediffmail.com),

Ph: +91 257 225842, Fax: +91-257-225840

**Table S1: Amount of FMT encapsulated within the CHGO samples  
(at encapsulation efficiency of 67.2 %)**

| Characterization | Amount of CHGO (mg) | Amount FMT encapsulated (mg) |
|------------------|---------------------|------------------------------|
| XRD              | 10                  | 0.75                         |
| FTIR             | 2                   | 0.14                         |
| SEM              | 1                   | 0.07                         |
| DSC              | 5                   | 0.37                         |

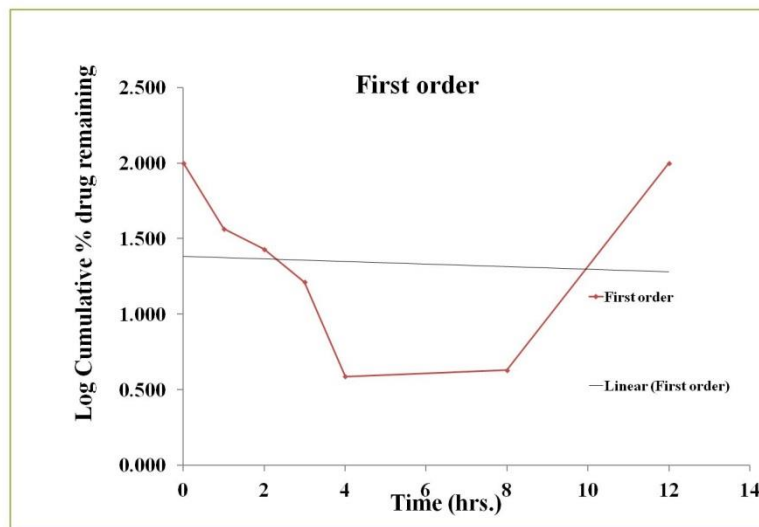

**Figure S1 Kinetics and drug release mechanism of CH-FMT**
